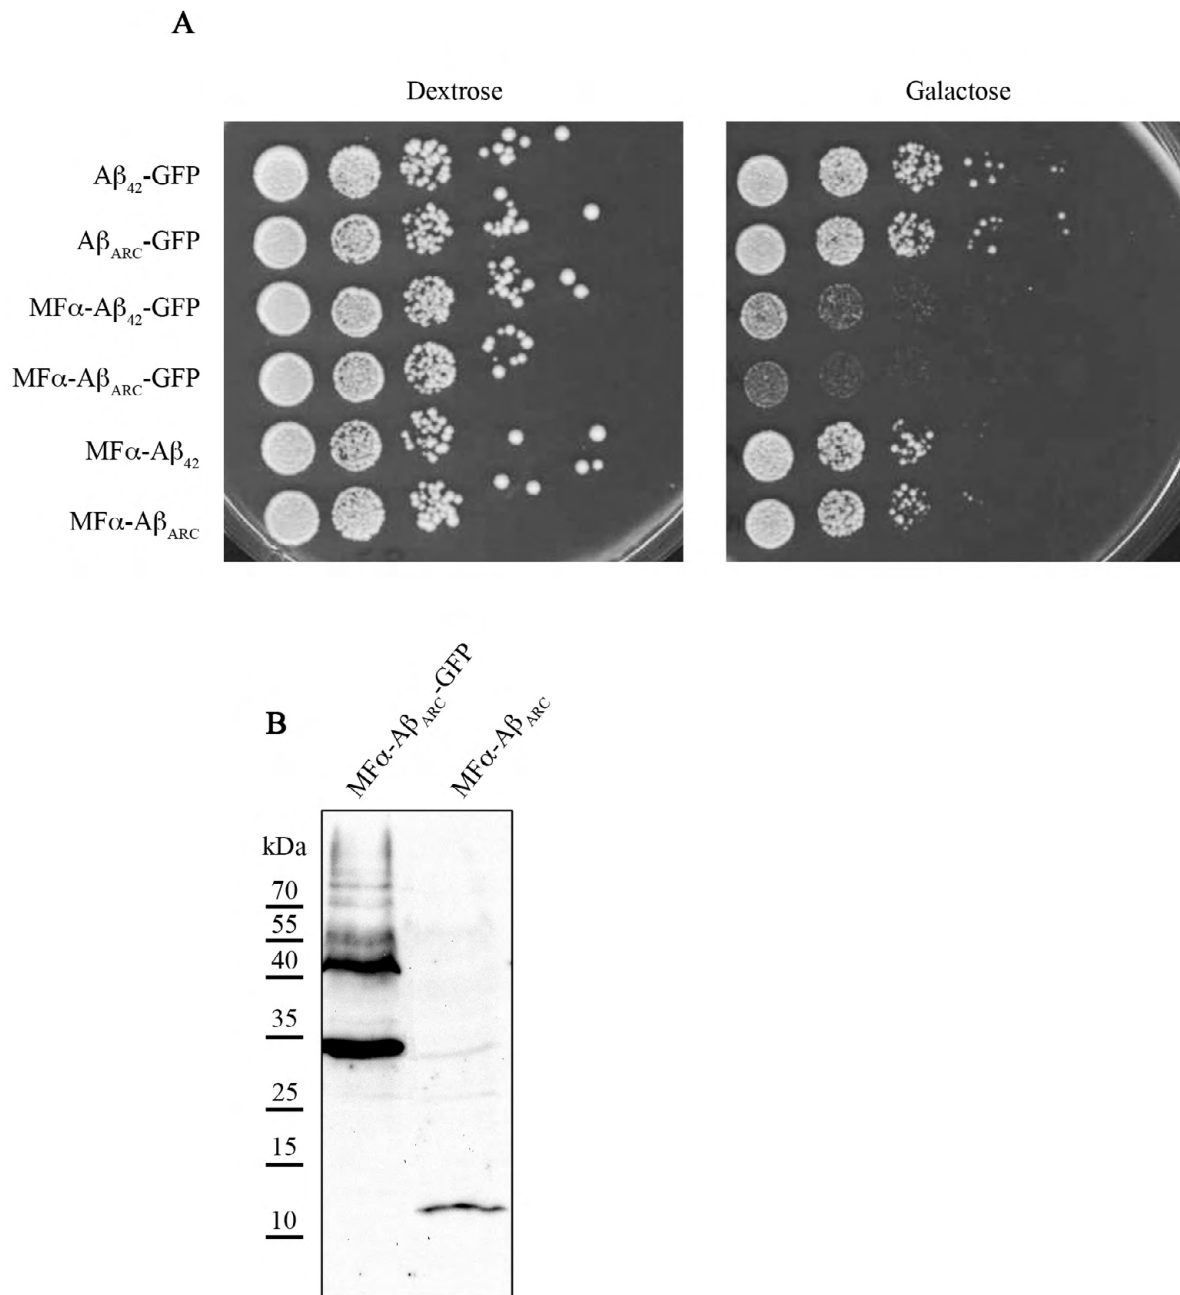

**Fig. S1. Toxicity of  $A\beta$  alone.** (A) Ten-fold dilutions of exponentially growing cultures of BY4742 cells transformed with plasmids carrying the different chimeric constructions under the GAL10 promoter were spotted onto SD (-) or SG (+) agar supplemented with 20 mg/l histidine, 20 mg/l lysine and 60 mg/l leucine. The cells were incubated at 30°C for 3 days. (B) BY4742 cells expressing the different chimeric proteins (6 hours of expression) were collected for total-protein extracts. Equal quantities of proteins were separated by SDS-PAGE on a 12% polyacrylamide gel, transferred onto a nitrocellulose membrane and exposed to anti- $A\beta$  (Tebu) antibodies.

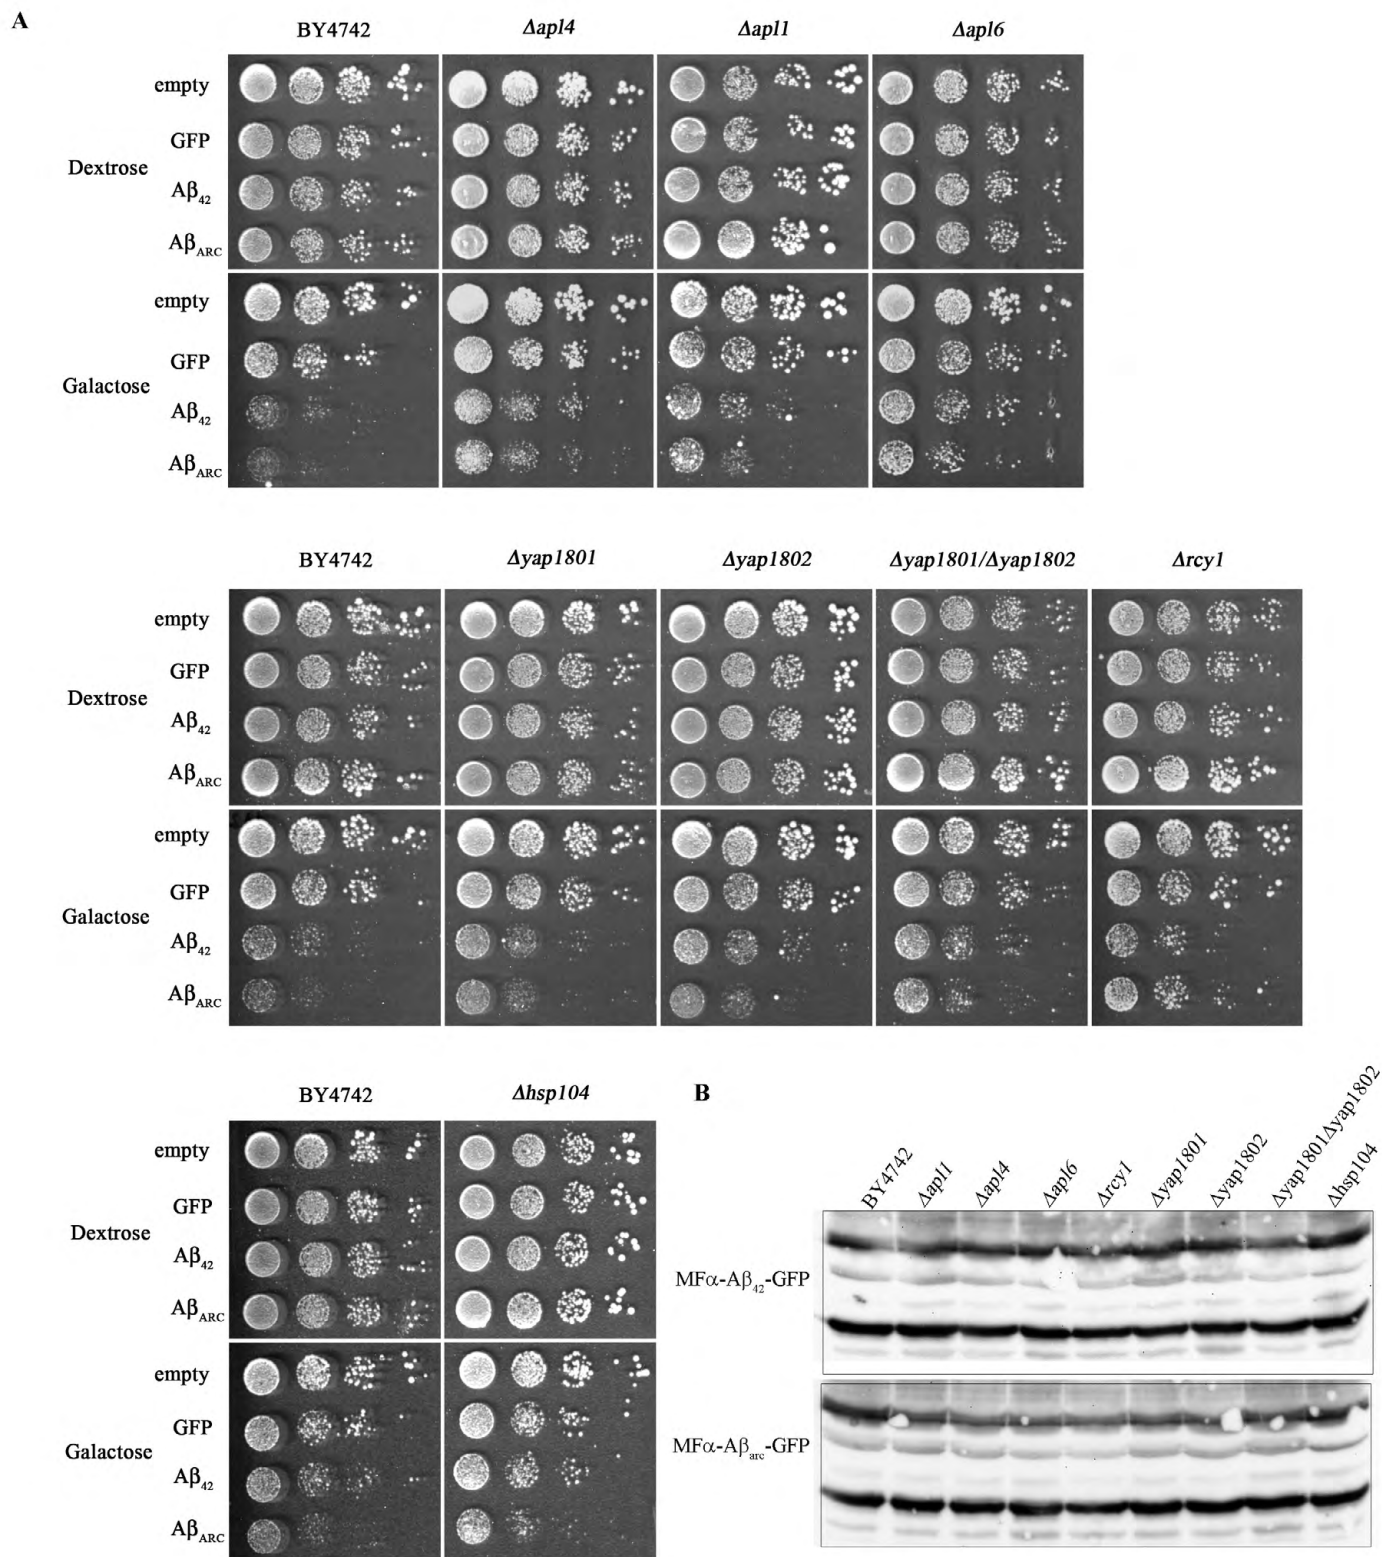

**Fig. S2. Yeast mutants modulate A $\beta$  toxicity without changing its protein level.** (A) Ten-fold dilutions of exponentially growing cultures of deleted strains transformed with plasmids carrying the different chimeric constructions under the GAL10 promoter were spotted on the same plate onto SD (-) or SG (+) agar supplemented with 20 mg/l histidine, 20 mg/l lysine and 60 mg/l leucine. (B) Cells expressing the different chimeric proteins (6 hours of expression) were collected for total-protein extracts. Equal quantities of proteins were separated by SDS-PAGE on a 12% polyacrylamide gel, transferred onto a nitrocellulose membrane, and then exposed to monoclonal anti-GFP antibodies (Sigma).

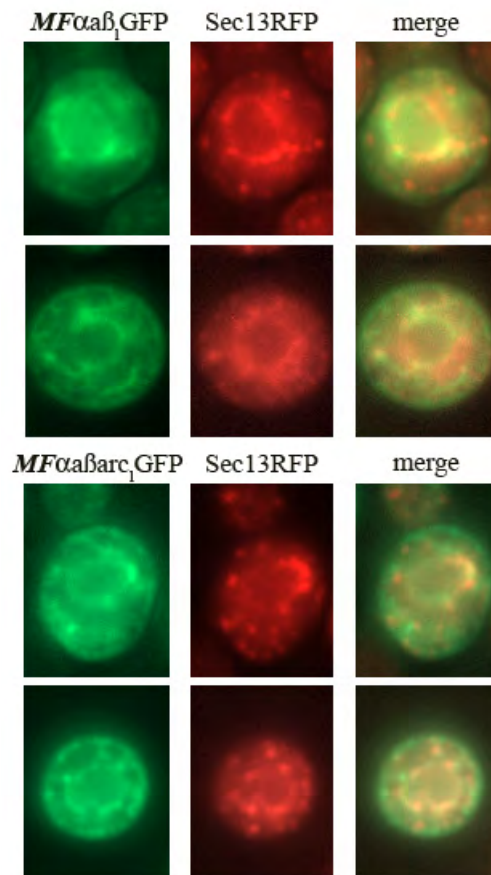

**Fig. S3. Aβ-GFP species colocalize with ER.** Wild-type or RFP-tagged strains were grown for 6 hours in SG liquid medium supplemented with 0.67% casaminoacids to induce the expression of the chimeric proteins and were then examined by epifluorescence microscopy.

**Table 1. Yeast strains used in this study**

| Name of strain           | Genotype                                                              | Source                          |
|--------------------------|-----------------------------------------------------------------------|---------------------------------|
| BY4742                   | <i>MATa, his3Δ1, leu2Δ0, ura3Δ0</i>                                   | Eurocarf yeast deletion library |
| <i>Δapl4</i>             | <i>MATa, his3Δ1, leu2Δ0, ura3Δ0, YPR029C::KanMX4</i>                  | Eurocarf yeast deletion library |
| <i>Δapl1</i>             | <i>MATa, his3Δ1, leu2Δ0, ura3Δ0, YJR005W::KanMX4</i>                  | Eurocarf yeast deletion library |
| <i>Δapl2</i>             | <i>MATa, his3Δ1, leu2Δ0, ura3Δ0, YKL135C::KanMX4</i>                  | Eurocarf yeast deletion library |
| <i>Δapl3</i>             | <i>MATa, his3Δ1, leu2Δ0, ura3Δ0, YBL037W::KanMX4</i>                  | Eurocarf yeast deletion library |
| <i>Δapm1</i>             | <i>MATa, his3Δ1, leu2Δ0, ura3Δ0, YPL259C::KanMX4</i>                  | Eurocarf yeast deletion library |
| <i>Δapm4</i>             | <i>MATa, his3Δ1, leu2Δ0, ura3Δ0, YOL062C::KanMX4</i>                  | Eurocarf yeast deletion library |
| <i>Δgga2</i>             | <i>MATa, his3Δ1, leu2Δ0, ura3Δ0, YHR108W::KanMX4</i>                  | Eurocarf yeast deletion library |
| <i>Δent5</i>             | <i>MATa, his3Δ1, leu2Δ0, ura3Δ0, YDR153C::KanMX4</i>                  | Eurocarf yeast deletion library |
| <i>Δclc1</i>             | <i>MATa, his3Δ1, leu2Δ0, ura3Δ0, YGR167W::KanMX4</i>                  | Eurocarf yeast deletion library |
| <i>Δrcy1</i>             | <i>MATa, his3Δ1, leu2Δ0, ura3Δ0, YJL204C::KanMX4</i>                  | Eurocarf yeast deletion library |
| <i>Δyap1801</i>          | <i>MATa, his3Δ1, leu2Δ0, ura3Δ0, YHR161C::KanMX4</i>                  | Eurocarf yeast deletion library |
| <i>Δyap1802</i>          | <i>MATa, his3Δ1, leu2Δ0, ura3Δ0, YGR241C::KanMX4</i>                  | Eurocarf yeast deletion library |
| <i>Δhsp104</i>           | <i>MATa, his3Δ1, leu2Δ0, lys2Δ0, ura3Δ0, YLL026W::KanMX4</i>          | Eurocarf yeast deletion library |
| <i>SEC13-RFP</i>         | <i>MATa, his3Δ1, leu2Δ0, lys2Δ0, ura3Δ0, YLR208W-RFP-KanMX6</i>       | Peter Arvidson                  |
| <i>Δyap1801/Δyap1802</i> | <i>MATa, his3Δ1, leu2Δ0, ura3Δ0, YHR161C::KanMX4, YGR241C::KanMX4</i> | This study                      |

**Table S1. Yeast strains used in this study.****Table S2. Oligonucleotides used in this study**

| Number | Sequence                                             |
|--------|------------------------------------------------------|
| 792    | AAATACACACACTAAATTACCGGATCCTATGGATGCAGAATTCCGACATG   |
| 794    | ACCAGTGAATAATTCTTCACCTTTAGACATCGCTATGACAACACCGCCCACC |
| 705    | GGATGGCCAGGCAACTTTAG                                 |
| 856    | GAATAATTCTTCACCTTTAGACATAGCTTCAGCCTCTCTTTTATC        |
| 858    | GAATAATTCTTCACCTTTAGACATGGATCCGGTAATTTAGTGTGT        |
| 859    | GTCATGTCGGAATTCTGCATCCATGGATCCGGTAATTTAGTGTGT        |
| 706    | TTTACACTTTATGCTTCCGG                                 |
| 857    | ATGTCTAAAGGTGAAGAATTATTC                             |
| 860    | ATGGATGCAGAATTCCGACATG                               |

**Table S2. Oligonucleotides used in this study.**
